# Supplementary figures and images for: Genomic landscape of metastatic lung adenocarcinomas from large-scale clinical sequencing
Source: PubMed Central journal article supplement — Neoplasia. 2021 Nov 1;23(12):1204–12. doi: 10.1016/j.neo.2021.10.001 (PMC8571538; doi:10.1016/j.neo.2021.10.001), 2021-11-01

Figure S1

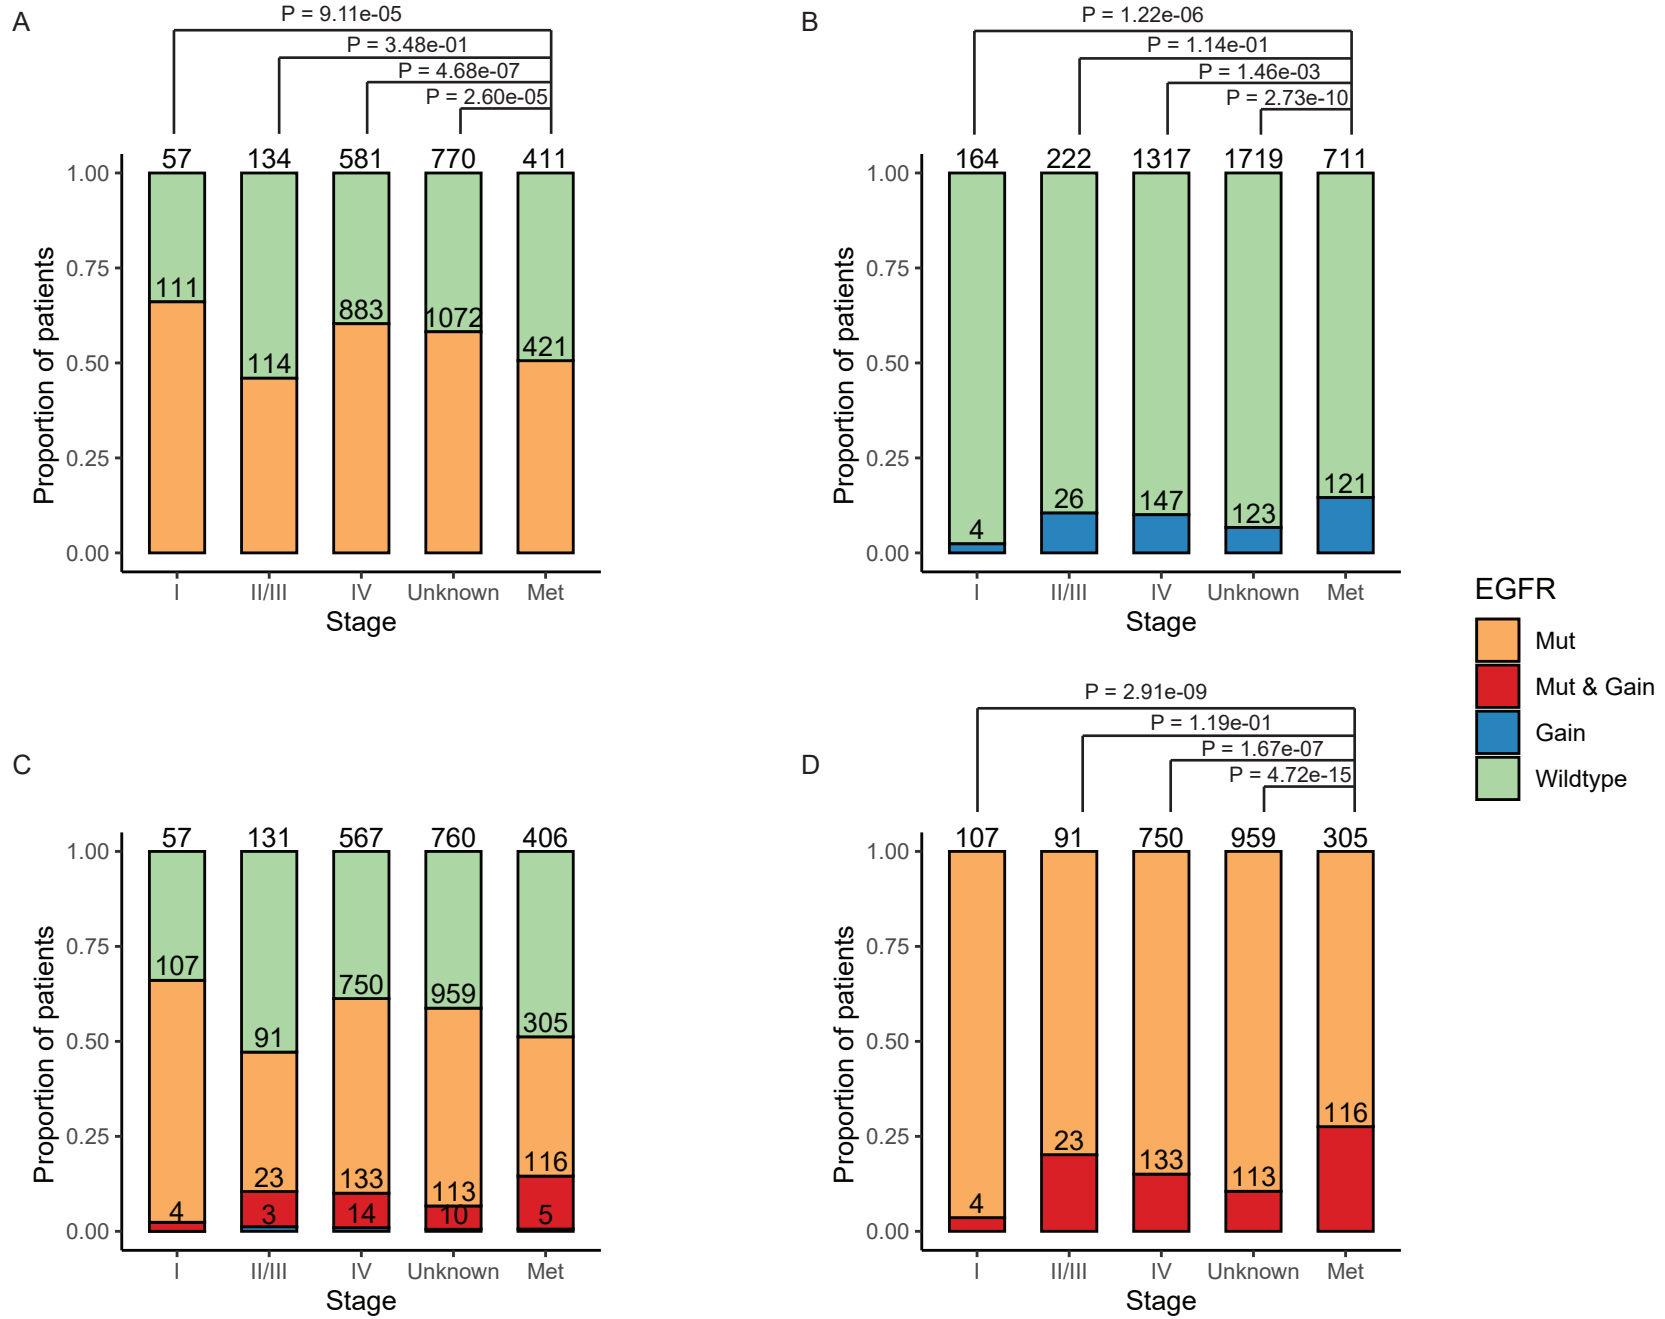

Supplement: mmc1.pdf [file mmc1.pdf]

Figure S2

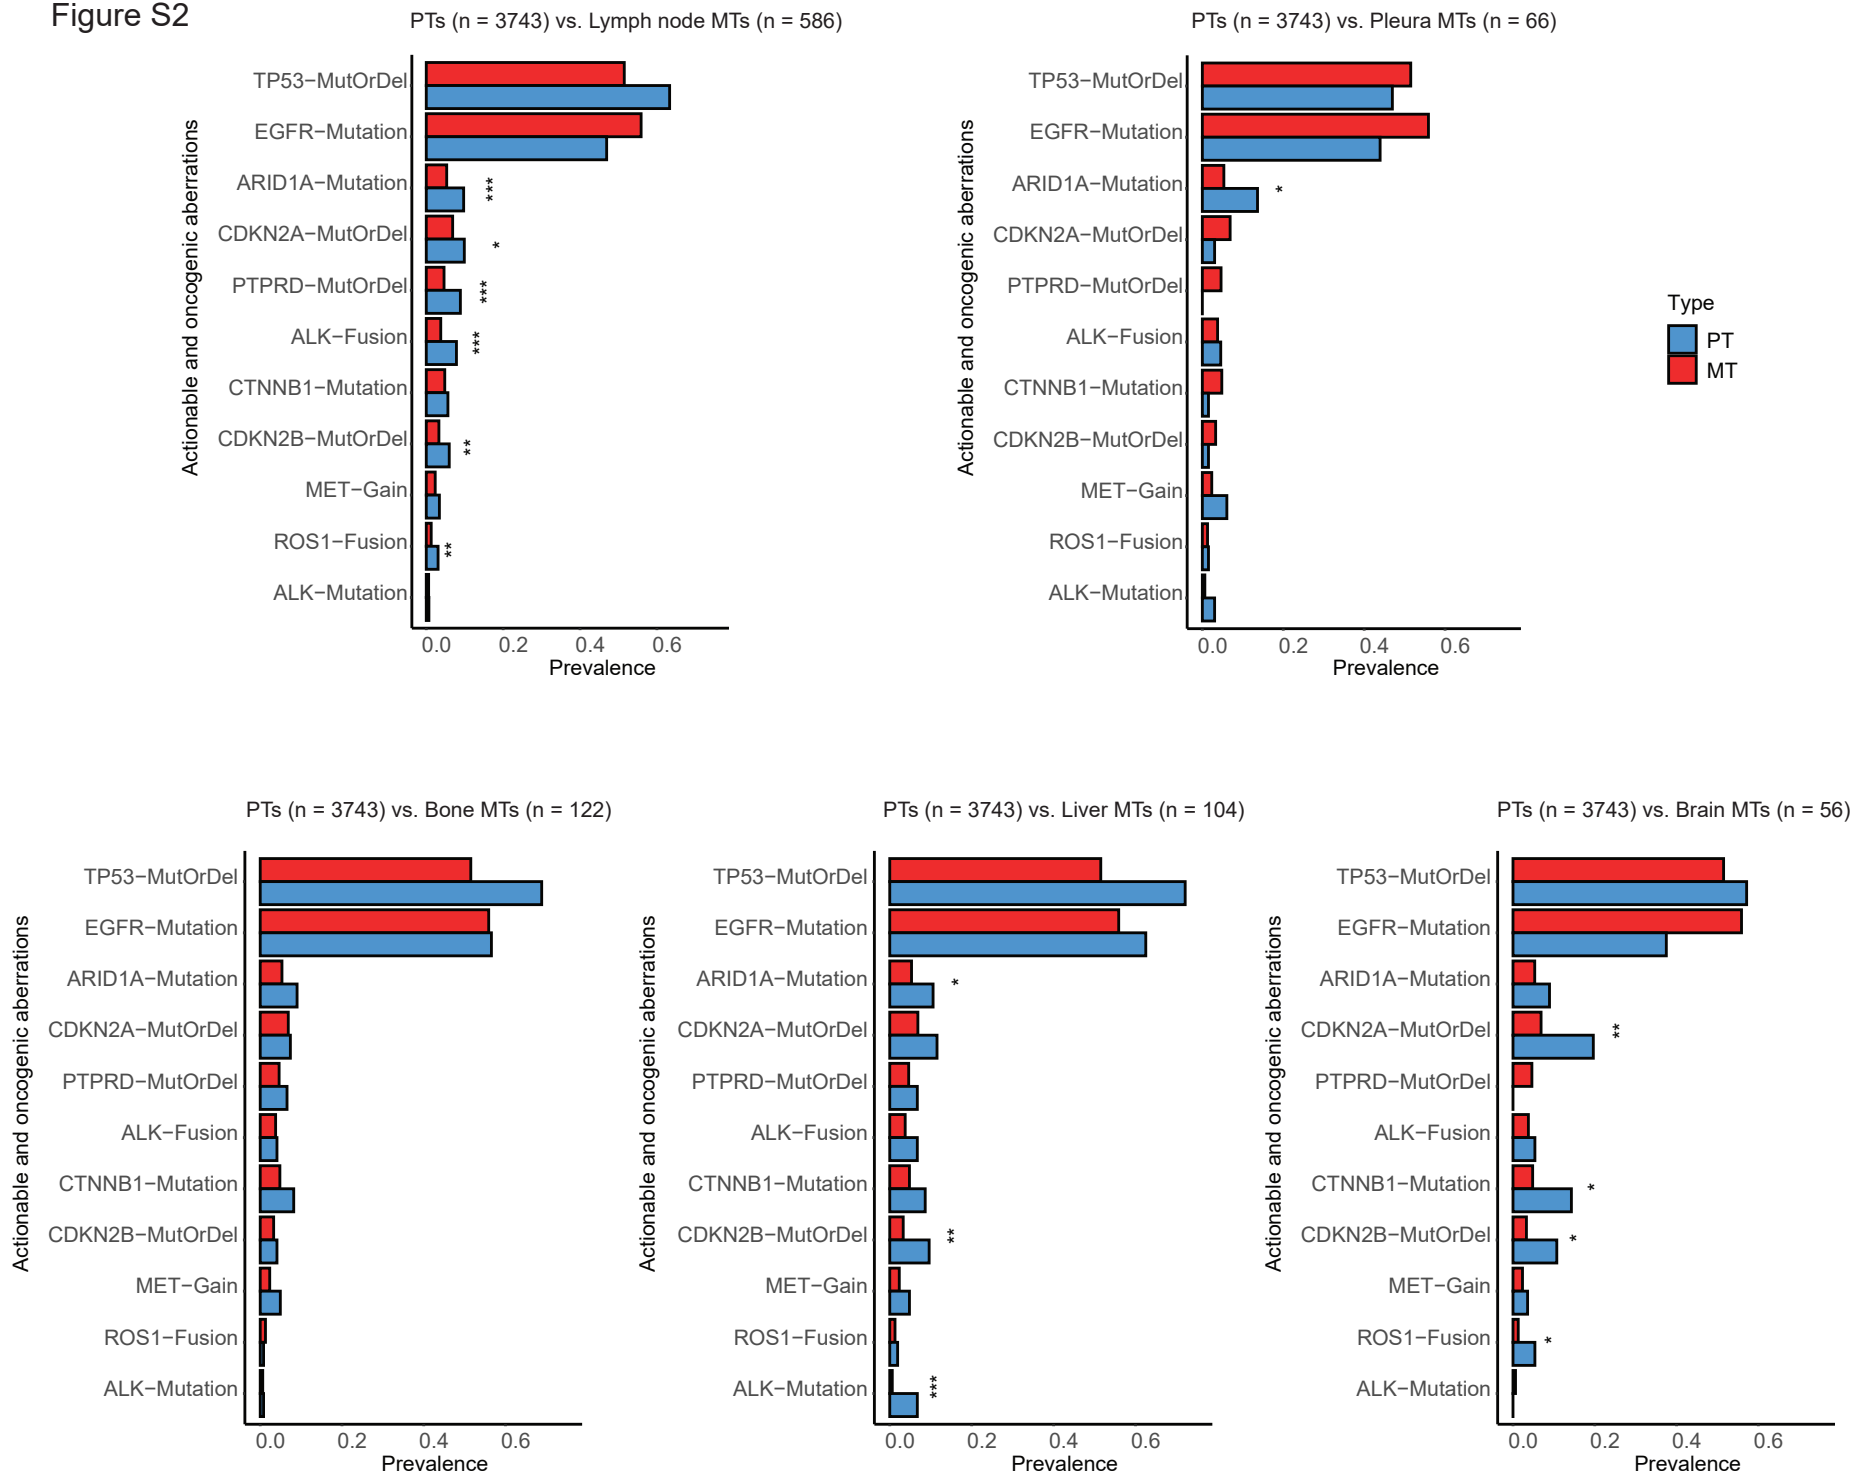

Supplement: mmc2.pdf [file mmc2.pdf]

Figure S3

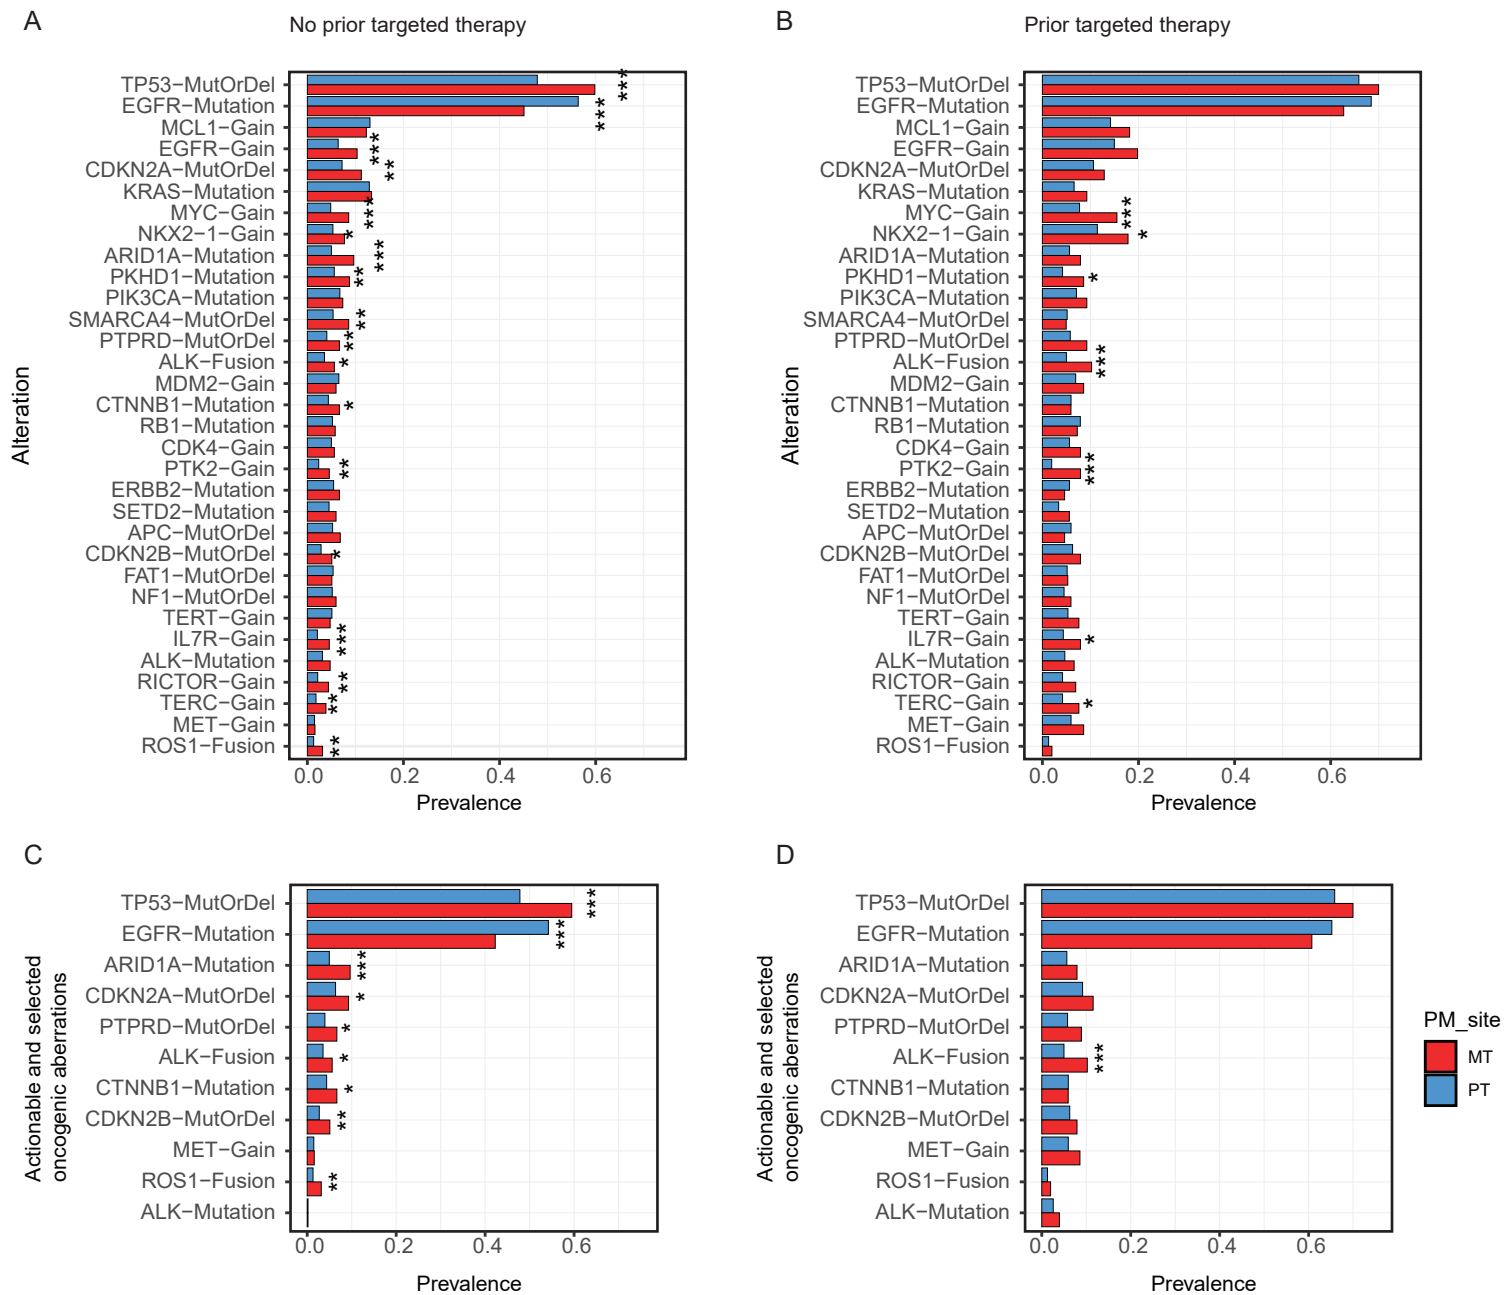

Supplement: mmc3.pdf [file mmc3.pdf]

Figure S4

A

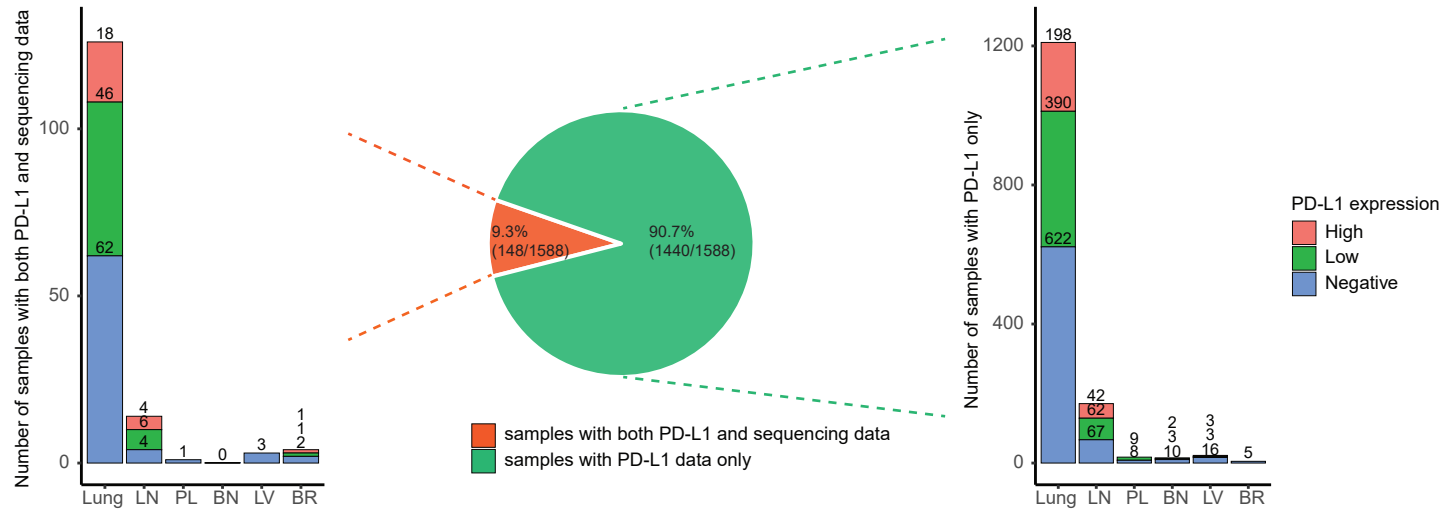

B

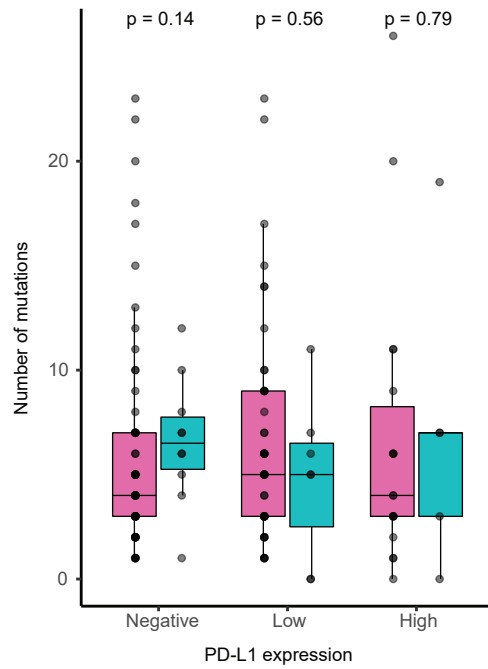

C

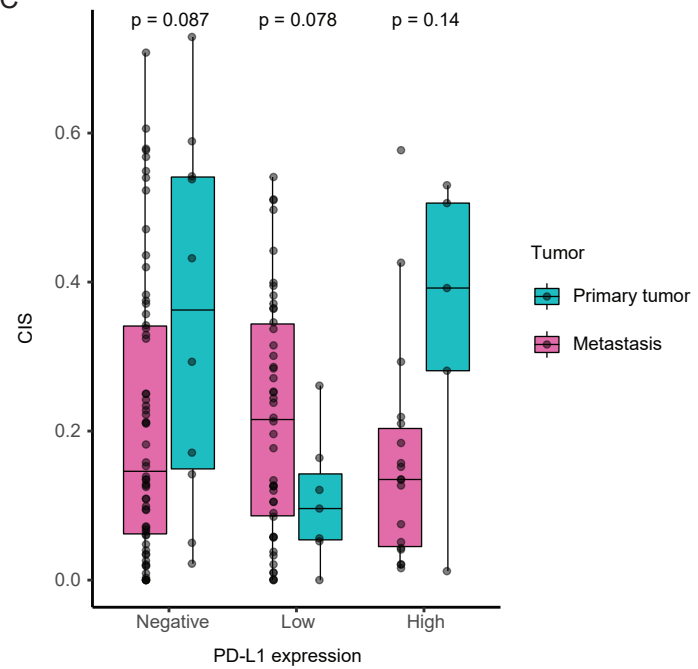

Supplement: mmc4.pdf [file mmc4.pdf]
